# Supplementary material for: Solution–liquid–solid growth of high-density CdTe nanowires on glass substrates and core/shell structure formation
Source: Royal Society of Chemistry journal article supplement (doi:10.1039/c2ce06429d), 2011-12-07
Supplement: c2ce06429d.pdf [file c2ce06429d.pdf]

## Supplementary Information for Solution-liquid-solid growth of high-density CdTe nanowires on glass substrates and core/shell structure formation

Yun-Mo Sung,<sup>\*a</sup> Woo-Chul Kwak<sup>a</sup> and Tae Geun Kim<sup>b</sup>

<sup>a</sup> Department of Materials Science & Engineering, Korea University, Seoul 136-713,

South Korea

<sup>b</sup> Department of Electrical Engineering, Korea University, Seoul 136-713, South Korea

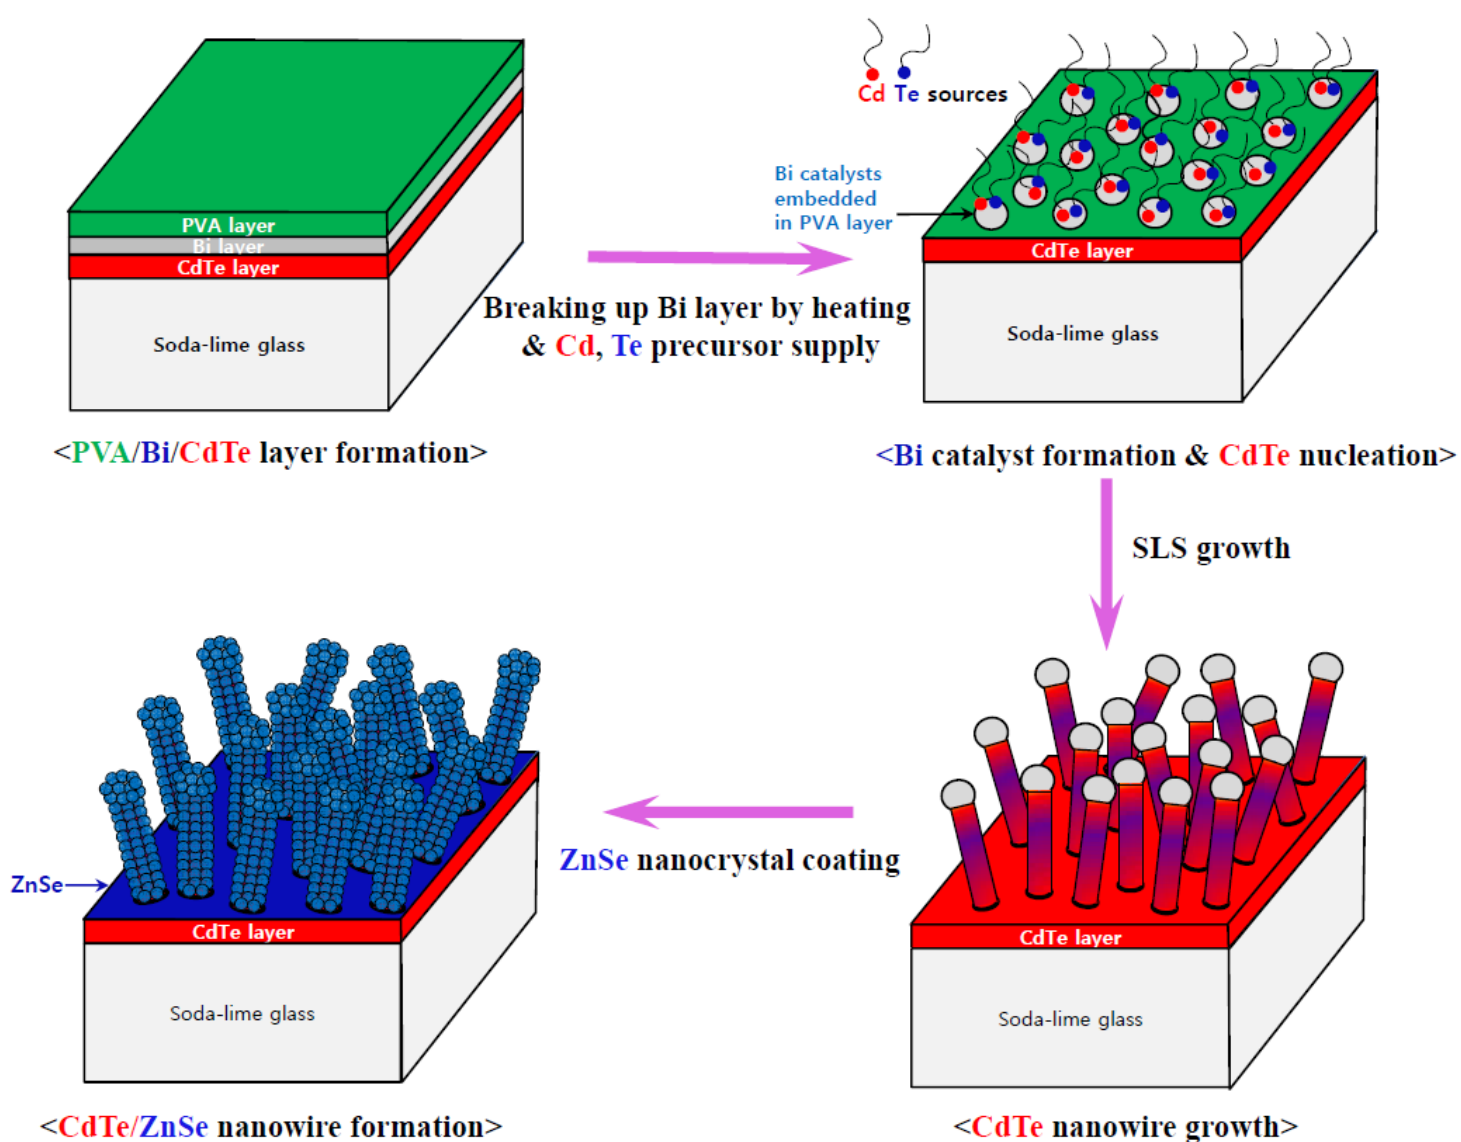

Fig. S1 Schematic of CdTe/ZnSe core/shell nanowire formation on soda-lime glass.
